# Supplementary material
Source: Springer Nature journal article supplement (https://www.springermedizin.de/resource/supplementary/12894_2014_371_MOESM1_ESM.pdf/9513646)

# Health states in model

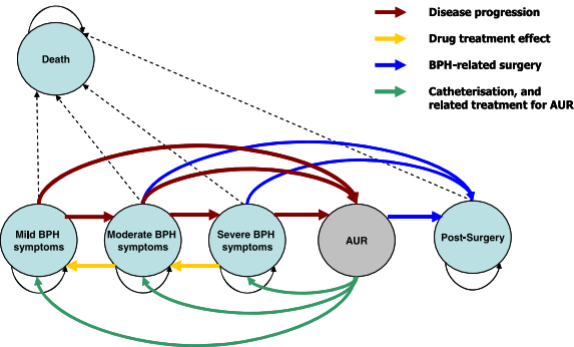

Supplement: MOESM1 [file 9513646]
